# Supplementary material for: Safety assessment of sulfasalazine: a pharmacovigilance study based on FAERS database
Source: Front Pharmacol. 2024 Sep 12;15:1452300. doi: 10.3389/fphar.2024.1452300 (PMC11424536; doi:10.3389/fphar.2024.1452300)
Supplement: Supplementary file 1 [file DataSheet1.xlsx]

## Sheet: SupplementaryTable S1
SupplementaryTable S1:PTs of AE reports related to sulfasalazine
SOC	PT	Case Reports	ROR(95% CI)	PRR(95% CI)	chisq	IC(IC025)	EBGM(EBGM05)
infections and infestations	necrotising fasciitis streptococcal	4	100.18(36.77, 272.88)	100.16(36.86, 272.15)	375.6	6.58(5.28)	95.85(41.44)
infections and infestations	mononucleosis syndrome	10	93.41(49.6, 175.9)	93.37(49.87, 174.82)	876.64	6.49(5.61)	89.61(52.77)
infections and infestations	human herpesvirus 6 infection reactivation	3	34.26(10.95, 107.16)	34.25(10.99, 106.75)	95.36	5.08(3.65)	33.74(12.99)
infections and infestations	human herpesvirus 6 infection	24	32.3(21.58, 48.34)	32.27(21.38, 48.7)	716.65	4.99(4.42)	31.81(22.7)
infections and infestations	infectious mononucleosis	20	23.12(14.88, 35.92)	23.1(15.01, 35.55)	418.44	4.52(3.89)	22.87(15.81)
infections and infestations	pneumonia cryptococcal	5	16.06(6.66, 38.72)	16.06(6.65, 38.8)	70.1	4(2.84)	15.95(7.64)
infections and infestations	measles	3	15.93(5.12, 49.6)	15.93(5.11, 49.65)	41.67	3.98(2.56)	15.82(6.12)
infections and infestations	pneumococcal infection	3	14.19(4.56, 44.15)	14.19(4.55, 44.23)	36.53	3.82(2.4)	14.1(5.45)
infections and infestations	meningitis aseptic	23	14.14(9.38, 21.31)	14.12(9.36, 21.31)	278.73	3.81(3.23)	14.04(9.96)
infections and infestations	purulence	11	13.35(7.38, 24.16)	13.35(7.42, 24.04)	124.89	3.73(2.91)	13.27(8.08)
infections and infestations	neutropenic sepsis	34	11.86(8.46, 16.62)	11.84(8.48, 16.52)	335.77	3.56(3.08)	11.78(8.89)
infections and infestations	latent tuberculosis	8	10.66(5.32, 21.36)	10.66(5.37, 21.17)	69.68	3.41(2.46)	10.61(5.93)
infections and infestations	impetigo	5	9(3.74, 21.65)	8.99(3.72, 21.72)	35.38	3.16(2.01)	8.96(4.3)
infections and infestations	anal abscess	17	8.69(5.39, 13.99)	8.68(5.42, 13.89)	115.09	3.11(2.44)	8.65(5.81)
skin and subcutaneous tissue disorders	oculomucocutaneous syndrome	16	96.13(58.26, 158.61)	96.06(57.71, 159.9)	1442.32	6.53(5.82)	92.09(60.57)
skin and subcutaneous tissue disorders	severe cutaneous adverse reaction	3	93.12(29.33, 295.66)	93.1(29.29, 295.92)	262.26	6.48(5.03)	89.37(33.99)
skin and subcutaneous tissue disorders	granulomatous dermatitis	3	34.08(10.89, 106.6)	34.07(10.93, 106.19)	94.84	5.07(3.64)	33.57(12.93)
skin and subcutaneous tissue disorders	drug reaction with eosinophilia and systemic symptoms	224	25.03(21.93, 28.57)	24.79(21.61, 28.44)	5058.46	4.62(4.43)	24.52(21.95)
skin and subcutaneous tissue disorders	sjs-ten overlap	3	19.79(6.35, 61.69)	19.79(6.35, 61.68)	53.05	4.29(2.87)	19.62(7.58)
skin and subcutaneous tissue disorders	drug eruption	106	16.43(13.57, 19.9)	16.36(13.45, 19.9)	1517.91	4.02(3.75)	16.25(13.84)
skin and subcutaneous tissue disorders	rash morbilliform	14	13.44(7.94, 22.73)	13.43(7.91, 22.8)	160.09	3.74(3.01)	13.35(8.6)
skin and subcutaneous tissue disorders	toxic skin eruption	38	9.82(7.14, 13.52)	9.81(7.17, 13.42)	299.35	3.29(2.83)	9.77(7.48)
skin and subcutaneous tissue disorders	dermatitis exfoliative	21	9.77(6.36, 15)	9.76(6.34, 15.02)	164.44	3.28(2.68)	9.72(6.79)
skin and subcutaneous tissue disorders	acute febrile neutrophilic dermatosis	8	9.6(4.8, 19.24)	9.6(4.83, 19.06)	61.38	3.26(2.31)	9.56(5.35)
skin and subcutaneous tissue disorders	hypersensitivity vasculitis	11	9.58(5.3, 17.33)	9.58(5.32, 17.25)	84.17	3.25(2.44)	9.54(5.81)
skin and subcutaneous tissue disorders	stevens-johnson syndrome	84	9.51(7.68, 11.79)	9.48(7.64, 11.76)	634.92	3.24(2.93)	9.45(7.89)
skin and subcutaneous tissue disorders	granuloma skin	3	9.08(2.92, 28.23)	9.08(2.91, 28.3)	21.48	3.18(1.76)	9.05(3.5)
investigations	human herpes virus 6 serology positive	6	64.51(28.64, 145.29)	64.49(28.87, 144.04)	364.38	5.97(4.88)	62.69(31.78)
investigations	lymphocyte morphology abnormal	10	41.28(22.08, 77.18)	41.26(22.04, 77.25)	385.66	5.34(4.48)	40.52(24.01)
investigations	epstein-barr virus antibody positive	4	25.33(9.45, 67.88)	25.33(9.51, 67.49)	92.41	4.65(3.37)	25.05(10.98)
investigations	lymphocyte stimulation test positive	8	21.66(10.8, 43.47)	21.66(10.7, 43.86)	156.08	4.42(3.48)	21.45(11.98)
investigations	antineutrophil cytoplasmic antibody positive	4	17.18(6.42, 45.96)	17.18(6.45, 45.78)	60.49	4.09(2.82)	17.06(7.49)
investigations	false negative investigation result	4	15.33(5.73, 40.99)	15.33(5.75, 40.85)	53.21	3.93(2.66)	15.23(6.69)
investigations	transaminases abnormal	3	13.72(4.41, 42.68)	13.71(4.4, 42.73)	35.14	3.77(2.35)	13.64(5.27)
investigations	red blood cell sedimentation rate abnormal	12	12.62(7.16, 22.26)	12.62(7.15, 22.28)	127.61	3.65(2.86)	12.55(7.8)
investigations	glycosylated haemoglobin decreased	6	10.66(4.78, 23.77)	10.65(4.77, 23.79)	52.23	3.41(2.34)	10.61(5.42)
investigations	c-reactive protein abnormal	20	10.62(6.84, 16.49)	10.61(6.89, 16.33)	173.34	3.4(2.78)	10.57(7.32)
investigations	false positive investigation result	4	9.98(3.74, 26.66)	9.98(3.75, 26.59)	32.18	3.31(2.05)	9.94(4.37)
investigations	haptoglobin decreased	3	9.81(3.16, 30.49)	9.81(3.15, 30.58)	23.62	3.29(1.87)	9.77(3.78)
blood and lymphatic system disorders	anaemia folate deficiency	10	162.09(85.27, 308.12)	162.02(84.85, 309.36)	1490.66	7.24(6.35)	150.99(88.21)
blood and lymphatic system disorders	lymphocytosis	20	24.49(15.76, 38.06)	24.47(15.9, 37.66)	445.28	4.6(3.98)	24.21(16.74)
blood and lymphatic system disorders	agranulocytosis	119	18.13(15.13, 21.72)	18.04(15.12, 21.52)	1900.09	4.16(3.9)	17.9(15.39)
blood and lymphatic system disorders	anaemia megaloblastic	3	17.31(5.56, 53.91)	17.3(5.55, 53.92)	45.73	4.1(2.68)	17.18(6.64)
blood and lymphatic system disorders	lymphadenitis	11	12.25(6.77, 22.15)	12.24(6.8, 22.04)	112.93	3.61(2.79)	12.18(7.42)
blood and lymphatic system disorders	macrocytosis	5	10.7(4.44, 25.76)	10.7(4.43, 25.85)	43.74	3.41(2.25)	10.65(5.11)
blood and lymphatic system disorders	eosinophilia	64	9.9(7.74, 12.66)	9.87(7.65, 12.73)	508.21	3.3(2.95)	9.83(8)
blood and lymphatic system disorders	haemolysis	26	8.71(5.93, 12.81)	8.71(5.89, 12.89)	176.65	3.12(2.57)	8.68(6.28)
blood and lymphatic system disorders	granulocytopenia	20	8.34(5.38, 12.94)	8.34(5.42, 12.84)	128.64	3.05(2.44)	8.31(5.75)
blood and lymphatic system disorders	lymphadenopathy	110	8.11(6.72, 9.78)	8.07(6.63, 9.82)	679.32	3.01(2.74)	8.04(6.88)
blood and lymphatic system disorders	anaemia of chronic disease	3	8.01(2.58, 24.9)	8.01(2.57, 24.97)	18.35	3(1.58)	7.99(3.09)
respiratory, thoracic and mediastinal disorders	pulmonary eosinophilia	7	38.29(18.13, 80.83)	38.27(18.17, 80.6)	249.76	5.23(4.22)	37.64(20.14)
respiratory, thoracic and mediastinal disorders	acute interstitial pneumonitis	4	20.36(7.61, 54.5)	20.36(7.64, 54.25)	72.94	4.33(3.06)	20.18(8.85)
respiratory, thoracic and mediastinal disorders	eosinophilic pneumonia	21	19.23(12.51, 29.56)	19.22(12.49, 29.58)	359.52	4.25(3.65)	19.06(13.3)
respiratory, thoracic and mediastinal disorders	alveolitis	10	16.52(8.87, 30.79)	16.52(8.82, 30.93)	144.7	4.04(3.18)	16.4(9.74)
respiratory, thoracic and mediastinal disorders	eosinophilic pneumonia acute	4	15.33(5.73, 40.99)	15.33(5.75, 40.85)	53.21	3.93(2.66)	15.23(6.69)
respiratory, thoracic and mediastinal disorders	pleural thickening	3	12.4(3.99, 38.59)	12.4(3.98, 38.65)	31.27	3.63(2.21)	12.34(4.77)
respiratory, thoracic and mediastinal disorders	pleural disorder	3	11.85(3.81, 36.85)	11.85(3.8, 36.93)	29.63	3.56(2.14)	11.79(4.56)
respiratory, thoracic and mediastinal disorders	pulmonary granuloma	5	11.4(4.73, 27.44)	11.39(4.71, 27.52)	47.16	3.5(2.35)	11.34(5.44)
respiratory, thoracic and mediastinal disorders	pleural fibrosis	4	9.04(3.39, 24.14)	9.04(3.39, 24.09)	28.49	3.17(1.9)	9.01(3.96)
respiratory, thoracic and mediastinal disorders	obliterative bronchiolitis	4	7.74(2.9, 20.66)	7.74(2.9, 20.62)	23.39	2.95(1.68)	7.71(3.39)
musculoskeletal and connective tissue disorders	mixed connective tissue disease	5	31.94(13.21, 77.24)	31.93(13.22, 77.13)	147.69	4.98(3.81)	31.49(15.04)
musculoskeletal and connective tissue disorders	seronegative arthritis	5	16.16(6.7, 38.95)	16.15(6.69, 39.01)	70.57	4(2.84)	16.04(7.68)
musculoskeletal and connective tissue disorders	joint destruction	8	13.37(6.67, 26.79)	13.36(6.73, 26.53)	90.97	3.73(2.79)	13.29(7.43)
musculoskeletal and connective tissue disorders	spondyloarthropathy	3	13.12(4.22, 40.81)	13.12(4.21, 40.89)	33.38	3.71(2.29)	13.04(5.05)
musculoskeletal and connective tissue disorders	joint ankylosis	3	13.04(4.19, 40.57)	13.04(4.18, 40.64)	33.15	3.7(2.28)	12.97(5.02)
musculoskeletal and connective tissue disorders	bone erosion	15	12.72(7.65, 21.13)	12.71(7.64, 21.16)	160.87	3.66(2.95)	12.64(8.27)
musculoskeletal and connective tissue disorders	dactylitis	4	11.14(4.17, 29.77)	11.14(4.18, 29.68)	36.74	3.47(2.2)	11.09(4.87)
musculoskeletal and connective tissue disorders	enthesopathy	6	10.01(4.49, 22.33)	10.01(4.48, 22.36)	48.43	3.32(2.25)	9.97(5.09)
musculoskeletal and connective tissue disorders	synovitis	58	9.29(7.18, 12.03)	9.27(7.18, 11.96)	426.23	3.21(2.84)	9.24(7.44)
musculoskeletal and connective tissue disorders	joint contracture	4	9.13(3.42, 24.37)	9.12(3.42, 24.3)	28.82	3.18(1.92)	9.09(4)
renal and urinary disorders	crystalluria	7	37.36(17.7, 78.86)	37.35(17.73, 78.66)	243.49	5.2(4.19)	36.74(19.66)
renal and urinary disorders	glomerulonephritis membranous	10	22.24(11.93, 41.48)	22.23(11.87, 41.62)	200.78	4.46(3.6)	22.02(13.08)
renal and urinary disorders	ureterolithiasis	5	13.57(5.63, 32.7)	13.57(5.62, 32.78)	57.85	3.75(2.6)	13.49(6.46)
renal and urinary disorders	glomerulonephritis rapidly progressive	5	12.44(5.16, 29.96)	12.43(5.15, 30.03)	52.28	3.63(2.47)	12.37(5.93)
renal and urinary disorders	glomerulonephritis	10	11.27(6.05, 20.98)	11.27(6.02, 21.1)	93.07	3.49(2.63)	11.21(6.67)
renal and urinary disorders	pyelocaliectasis	4	11.1(4.16, 29.66)	11.1(4.17, 29.58)	36.58	3.47(2.2)	11.05(4.86)
renal and urinary disorders	calculus urinary	6	9.85(4.42, 21.96)	9.84(4.41, 21.98)	47.46	3.29(2.22)	9.8(5.01)
renal and urinary disorders	ureteric stenosis	3	9.71(3.12, 30.18)	9.71(3.12, 30.26)	23.33	3.27(1.86)	9.67(3.74)
hepatobiliary disorders	hepatosplenomegaly	16	15.58(9.52, 25.47)	15.57(9.54, 25.42)	216.55	3.95(3.26)	15.46(10.25)
hepatobiliary disorders	granulomatous liver disease	4	15.15(5.67, 40.5)	15.14(5.68, 40.34)	52.48	3.91(2.64)	15.05(6.61)
hepatobiliary disorders	hepatitis acute	20	8.03(5.18, 12.46)	8.03(5.22, 12.36)	122.6	3(2.38)	8(5.54)
gastrointestinal disorders	eosinophilic colitis	3	23.2(7.44, 72.36)	23.19(7.44, 72.28)	63.05	4.52(3.1)	22.96(8.86)
gastrointestinal disorders	lip ulceration	4	8.82(3.3, 23.54)	8.81(3.31, 23.47)	27.6	3.13(1.87)	8.78(3.86)
gastrointestinal disorders	neutropenic colitis	6	8.4(3.77, 18.73)	8.4(3.76, 18.76)	38.96	3.07(1.99)	8.37(4.28)
congenital, familial and genetic disorders	teratogenicity	5	41.43(17.1, 100.36)	41.42(17.15, 100.06)	193.58	5.35(4.18)	40.67(19.4)
congenital, familial and genetic disorders	foetal malformation	5	11.85(4.92, 28.54)	11.85(4.91, 28.63)	49.39	3.56(2.4)	11.79(5.65)
congenital, familial and genetic disorders	hydrocele	4	9.24(3.46, 24.67)	9.24(3.47, 24.62)	29.27	3.2(1.93)	9.2(4.05)
reproductive system and breast disorders	infertility male	4	21.45(8.01, 57.43)	21.44(8.05, 57.13)	77.22	4.41(3.14)	21.25(9.32)
reproductive system and breast disorders	genital ulceration	3	12.27(3.94, 38.15)	12.26(3.93, 38.21)	30.87	3.61(2.19)	12.2(4.72)
nervous system disorders	peripheral sensorimotor neuropathy	4	9.82(3.68, 26.22)	9.82(3.69, 26.16)	31.53	3.29(2.02)	9.78(4.3)
nervous system disorders	axonal neuropathy	3	9.35(3.01, 29.07)	9.35(3, 29.14)	22.28	3.22(1.8)	9.31(3.61)
neoplasms benign, malignant and unspecified (incl cysts and polyps)	hepatosplenic t-cell lymphoma	4	26.71(9.97, 71.61)	26.71(10.02, 71.17)	97.8	4.72(3.45)	26.4(11.57)
neoplasms benign, malignant and unspecified (incl cysts and polyps)	lymphoproliferative disorder	10	9.22(4.95, 17.16)	9.22(4.92, 17.26)	72.94	3.2(2.34)	9.18(5.46)
immune system disorders	drug hypersensitivity	838	11.34(10.58, 12.15)	10.95(10.32, 11.61)	7562.02	3.45(3.35)	10.9(10.28)
immune system disorders	anti-neutrophil cytoplasmic antibody positive vasculitis	7	9.24(4.4, 19.41)	9.24(4.39, 19.46)	51.2	3.2(2.2)	9.2(4.94)
general disorders and administration site conditions	enanthema	3	13.33(4.28, 41.47)	13.33(4.28, 41.55)	34	3.73(2.31)	13.25(5.13)
general disorders and administration site conditions	face oedema	51	7.66(5.82, 10.09)	7.65(5.81, 10.07)	293.67	2.93(2.54)	7.62(6.05)
cardiac disorders	eosinophilic myocarditis	12	49.17(27.75, 87.15)	49.15(27.84, 86.77)	553.68	5.59(4.79)	48.1(29.8)
cardiac disorders	pleuropericarditis	6	44.83(19.97, 100.61)	44.82(20.07, 100.11)	251.91	5.46(4.38)	43.94(22.34)
pregnancy, puerperium and perinatal conditions	maternal condition affecting foetus	3	31.19(9.98, 97.48)	31.18(10, 97.18)	86.42	4.94(3.52)	30.76(11.85)
metabolism and nutrition disorders	folate deficiency	6	14.63(6.55, 32.65)	14.62(6.55, 32.65)	75.66	3.86(2.79)	14.53(7.42)
